# Supplementary material for: DNA Methylomes and Epigenetic Age Acceleration Associations with Poor Metabolic Control in T1D
Source: MDPI journal article supplement (doi:10.3390/biomedicines9010013), 2020-12-24

**A**

Pan-tissue age acceleration

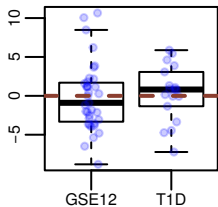

Pan-tissue age acceleration

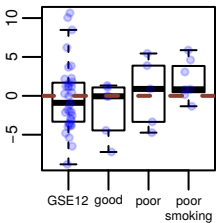**B**

GrimAge acceleration

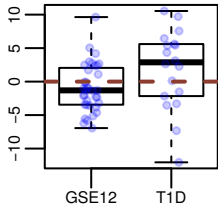

GrimAge acceleration

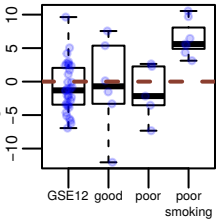

Supplement: s1 [file s1]
