# Supplementary figures and images for: DNA Methylomes and Epigenetic Age Acceleration Associations with Poor Metabolic Control in T1D
Source: MDPI journal article supplement (doi:10.3390/biomedicines9010013), 2020-12-24

**A**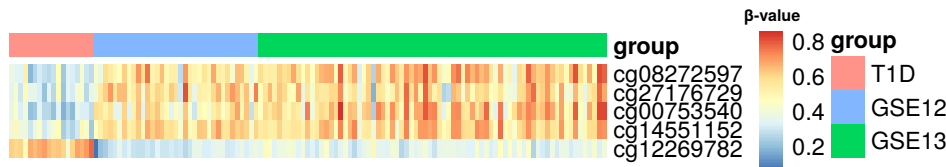**B**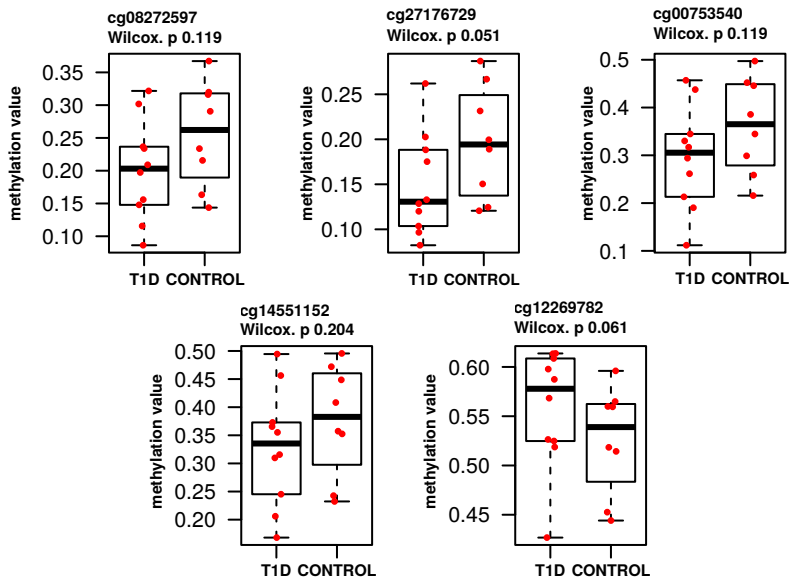

Supplement: s1 [file s1]
